# Supplementary material
Source: Springer Nature journal article supplement (https://www.springermedizin.de/resource/supplementary/12985_2010_856_MOESM1_ESM.pdf/9608604)
Supplement: MOESM1 [file 9608604]

|          |    |                                                           |     |
|----------|----|-----------------------------------------------------------|-----|
| KWT1     | AA | CAGTTATATGGATGATGTGGTATTGGGGCCAAGTCTGTACAGCATCTTGAGTCCCTT | 264 |
| KWT2     | AA | -----                                                     |     |
| KWT3     | AA | -----                                                     |     |
| KWT4     | AA | -----                                                     |     |
| KWT5     | AA | -----                                                     |     |
| KWT6     | AA | -----                                                     |     |
| KWT7     | AA | -----                                                     |     |
| KWT8     | AA | -----                                                     |     |
| KWT9     | AA | -----                                                     |     |
| KWT10    | AA | -----                                                     |     |
| KWT11    | AA | -----                                                     |     |
| KWT12    | AA | -----                                                     |     |
| KWT13    | AA | -----                                                     |     |
| X59795   | TT | -----                                                     |     |
| KWT14    | AA | -----                                                     |     |
| AJ344116 | TT | -----                                                     |     |
| AY161157 | TT | -----A-----A-----                                         |     |
| KWT15    | AA | -----                                                     |     |
| AB033559 | TT | -----                                                     |     |
| KWT16    | AA | -----                                                     |     |
| AB078032 | TT | -----                                                     |     |
| AY090453 | TT | -----                                                     |     |
| AY741796 | TT | -----G-----G-----                                         |     |
| AB126581 | TT | -----                                                     |     |
| AB104712 | TT | -----C-----G-----                                         |     |
| AY721605 | TT | -----TC-----                                              |     |
